# Supplementary material for: To defend or to attack? Antagonistic interactions between Serratia plymuthica and fungal plant pathogens, a species-specific volatile dialogue
Source: Frontiers journal article supplement (doi:10.3389/fsufs.2022.1020634), 2022-10-28
Supplement: Data_Sheet_1.pdf [file Data_Sheet_1.pdf]

## Supplementary Material File 1

### Supplementary Results

#### **Production of specific volatiles by *S. plymuthica* HRO-C48 as a response to treatments with fungal VOCs**

Seven further substances were emitted due to the contact with one or two of the tested fungi, while not being detected in the control. Four of them were produced only when *Serratia* was confronted with *V. longisporum* VOCs. Among those VOCs, 1-decanol, octanoic acid, ethyl ester and 2-undecanone are known for their antimicrobial properties (Kato and Shibasaki, 1980; Kubo et al., 1995; Togashi et al., 2007; Fialho et al., 2011; Popova et al., 2014; Toffano et al., 2017), while 2-heptanol is mentioned in the literature as a volatile substance that interferes with plants (Kanchiswamy et al., 2015). Incubation of HRO-C48 with *L. maculans* MB and *V. longisporum* ELV 43 VOCs resulted in the production of isoamyl acetate, which was not detected in the untreated control or in the treatment with *R. solani* AG2. Isoamyl acetate is known as the main antimicrobial substance found in the Japanese rice wine sake (Strobel et al., 2001; Ando et al., 2015). Another substance with an unknown ecological function, 2-methyl-3-hexanol, was produced by *S. plymuthica* HRO-C48 only when it was incubated with *R. solani* AG2 (Supplementary Table 2). Contact of *S. plymuthica* HRO-C48 with *V. longisporum* ELV 43 VOCs resulted in a significantly stronger upregulation of VOCs production in the bacterium compared to the other fungi tested. Among 22 upregulated VOCs there were 14 substances with putative antimicrobial function, seven with predicted functions that involve interaction with other microorganisms and plants and two VOCs with unknown function (Supplementary Table 2). Only two VOCs with predicted antimicrobial function were downregulated in *S. plymuthica* HRO-C48 due to *V. longisporum* volatiles when compared to the untreated control (Supplementary Table 2). VOCs produced by *R. solani* AG2 had an intermediate effect on the VOCs production in *Serratia*. Eight VOCs were upregulated, and five were downregulated due to the contact with fungal volatiles. Among the eight upregulated substances, six had a predicted antimicrobial function. For example, 2,3-butanediol, is predicted to be antimicrobial, plant growth promoting and have a positive effect on the biofilm formation in some bacteria (Ryu et al., 2003, 2004; Zhang et al., 2007a; Venkataraman et al., 2014; Audrain et al., 2015). From the downregulated VOCs, two are suggested to have an antimicrobial effect, while the other three may induce plant responses and influence biofilm formation in some bacterial species (Supplementary Table 2). *L. maculans* MB 158 VOCs had the weakest effect on the bacterial VOCs production. Only five substances, three of them predicted to be antimicrobial and two with unknown function were upregulated in the bacterium. No downregulation of VOCs production in *Serratia* due to *L. maculans* volatiles was observed (Supplementary Table 2).

### **Response of the selected fungi to VOCs emitted by *S. plymuthica* HRO-C48**

Three substances were identified in the volatilome of *R. solani* AG2: isobutanol, 2-methyl-1-butanol, and dimethyl ether (a substance with unknown function). All three substances were shared with those produced by *V. longisporum* ELV 43 (Fig. 2). Their production was not significantly influenced by the treatment with *S. plymuthica* HRO-C48 volatiles. The production of isobutanol, 2-methyl-1-butanol, and dimethyl ether by *R. solani* AG2 was not significantly influenced by the treatment with *S. plymuthica* HRO-C48 volatiles (Supplementary Table 3). Isobutanol is an antibacterial and plant growth promoting substance (Akpata and Akinrimisi, 1977; Naznin et al., 2013; Farh and Jeon, 2020), while 2-methyl-1-butanol, is mentioned by several authors as a VOC with antimicrobial effects (Saksena and Tripathi, 1987; Linton and Wright, 1993a; Humphris et al., 2001; Toffano et al., 2017). Two further substances, 3-propoxy-1-propene (a substance with unknown function) and ethanol were completely downregulated due to the contact with *S. plymuthica* HRO-C48. Ethanol is mentioned in the literature as an antimicrobial substance that may inhibit fungal spore germination and have a negative effect on biofilm formation in some bacterial species (Linton and Wright, 1993b; Létoffé et al., 2014; Audrain et al., 2015; Lazazzara et al., 2017).

*V. longisporum* ELV 43 produced the highest number of volatiles among the three tested fungi. Out of 14 VOCs that were detected in the volatilome of *V. longisporum* four were strongly upregulated and 6 downregulated due to the contact with *S. plymuthica* HRO-C48 volatiles (Fig. 2). Three novel substances were produced by *V. longisporum* ELV 43 when it was incubated with *S. plymuthica* HRO-C48: 2-methyl-propanal, 3-methyl-1-butanol acetate, and acetic acid. The last two substances were also produced by *S. plymuthica* HRO-C48 (Table 2), so it cannot be ruled out that only one of the two microorganisms produced one or both substances and cross-contaminated the other one with its volatiles. All three substances are mentioned in the literature as having antimicrobial properties or being able to induce bacterial responses (Strobel et al., 2001; Pimenta et al., 2012; Ando et al., 2015; Kanchiswamy et al., 2015). Six VOCs were either completely switched off due to the contact with bacterial volatiles in *V. longisporum*, or significantly downregulated. From these substances two (3-methyl-pentane and , 3-methyl-3-hepten-2-one) are known for their antimicrobial properties (Kumari et al., 2019) (GROVER and GS, 1980) and one substance 1-butanol has a species-specific effect on biofilm formation in some bacteria and fungi (Létoffé et al., 2014; Audrain et al., 2015). The functions of the other three downregulated VOCs are not mentioned in the current literature.

### **A common response *S. plymuthica* HRO-C48 to the VOCs of all three tested fungi on the transcriptomic level**

Thirty-nine DEGs were common among the genes upregulated due to the exposure to all three fungal VOCs (Supplemental Table S4). Out of these, 11 genes which were with no predicted function were found. Some of the upregulated genes on the other hand (e.g. SOD10\_RS23105, SOD10\_RS23095,

and SOD10\_RS18925) were predicted to code for a phage shock protein. Phage proteins like (Phage shock protein B) belongs to the bacterial phage shock protein stress response system which is activated by events affecting the cytoplasmic membrane. Phage shock protein B was previously shown to prevent lethal cytoplasmic membrane permeability in *Yersinia enterocolitica* and is considered as a sign of a cellular stress (Horstman and Darwin, 2012). Interestingly, the gene (SOD10\_RS21985) coding for Type III secretion system lipoprotein chaperone was observed among the upregulated genes upon exposure to volatiles emitted by *S. plymuthica* HRO-C48. The type III secretion system has been previously associated with virulence in some enteropathogenic bacteria like *E.coli* and *Salmonella* spp. (Tosi et al., 2011; Dunstan et al., 2013). A list of all genes which were upregulated in response to confrontation with volatiles from the pathogenic fungi: *R. solani* AG2 (Riz), *L. maculans* MB 158 (Lep) and *V. longisporum* ELV 43 (Ver) have been provided in Supplemental Table S4.

Sixty-three genes were significantly downregulated in *S. plymuthica* HRO-C48 due to the contact with the VOCs of all three fungi. Among them there was one membrane protein (SOD10\_RS05170) with peroxide and acid stress response properties. The downregulation of outer membrane proteins, which was also observed, is considered to be a signal of an envelope stress in a ‘sigma E dependent’ manner (Johansen et al., 2008). It prevents further buildup of misfolded outer membrane proteins in the extra cytoplasmic compartment. Another indication for cellular stress is a downregulation of the two predicted multiple stress resistance proteins BhsA (SOD10\_RS16560 and SOD10\_RS16565). Disruption of BhsA increases copper sensitivity, induces stress response genes in biofilms, increases aggregation and cell surface hydrophobicity, and decreases indole synthesis. Downregulation of BhsA may also increase biofilm formation by repressing cell-cell interactions and cell surface interactions (Zhang et al., 2007b). A murein hydrolase protein (SOD10\_RS19040) is predicted to be involved in regulation of cell wall growth, turnover of peptidoglycan during growth, separation of daughter cells during cell division and autolysis, and in lysis phenomena. A downregulation of the murein hydrolase protein may lead to a slowdown of assembly of large trans-envelope complexes (pili, flagella, secretion systems) and thus could be involved in the decrease of cellular movement and enhance biofilm formation processes (Vollmer et al., 2008). Furthermore, we observed a downregulation of a putative Ferritin-like protein (SOD10\_RS01830) in the transcriptome of the *S. plymuthica* HRO-C48 upon the incubation with the volatiles of all three fungi. This class of proteins is involved in iron detoxification as it can protect bacterial cells from iron overload and serve as an iron source when iron is limited. It also protects the bacterial cells against oxidative stress and/or protects DNA against enzymatic or oxidative attack (Smith, 2004). Taken together, this data suggests that the contact of *S. plymuthica* HRO-C48 with VOCs emitted by *V. longisporum*, *R. solani* and *L. maculans* activates several stress response systems in bacterial cells by up- and downregulation of the transcription of respective genes, thus protecting the bacterial cells from damage by fungal VOCs. Another predicted effect of the VOCs

of all three fungal species on *S. plymuthica*, based on the transcriptome analysis, is the downregulation of cellular motility and enhancement of biofilm formation processes. However, due to limitations in the database for functional prediction, several genes (COG= no functional prediction) could not be assigned. The list of *S. plymuthica* genes which were down-regulated upon VOCs exposure have been provided in Supplemental Table S4.

### **Different expression of genes involved in selected functions with the focus on virulence**

*R. solani* VOCs resulted in a much stronger upregulation of predicted virulence-associated genes (3 upregulated). In the samples treated with *V. longisporum* and *L. maculans* VOCs, the expression of virulence-associated genes was often downregulated. Three genes were downregulated, and two were upregulated due to *L. maculans* VOCs, while three genes were downregulated and upregulated due to contact with *V. longisporum* volatiles (Supplemental Table S5). Among the genes upregulated due to treatment with *R. solani* VOCs one gene coding for a predicted enzyme of phenylacetate metabolism was found. Pathways involved in aerobic aromatic compounds metabolism occur in various pathogens, where reactive early intermediates may contribute to virulence (Teufel et al., 2010). Another identified DEG, SOD10\_RS08975, codes for a putative HPr-related protein which is involved in the phosphotransferase system. HPr-related proteins are known to interfere with the virulence of some pathogens (Deutscher et al., 2006). The expression of two predicted lipoproteins (coded by genes SOD10\_RS05020 and SOD10\_RS23345) was significantly downregulated in *S. plymuthica* HRO-C48 due to the contact with *L. maculans* MB158 volatiles. Both of them play roles in bacterial virulence (Ohara et al., 1999; Zückert, 2014). Similarly, the expression of two genes putatively coding for DNA-binding ferritin-like proteins involved in bacterial virulence (Andrews, 2010) was downregulated due to the *L. maculans* MB158 treatment (Supplemental Table S5).

Some virulence-associated genes were differently regulated due to treatments with various fungal species. A gene coding for a predicted lactoylglutathione lyase was significantly upregulated in *S. plymuthica* HRO-C48 due to exposure to *R. solani* VOCs and downregulated in the *V. longisporum* treatment. Lactoylglutathione lyase is involved in methylglyoxal detoxification, and functions as a virulence factor in *Salmonella typhimurium* (Chakraborty et al., 2015). Similarly, we observed an upregulation of one gene putatively coding for a Sec-independent protein secretion pathway component (SOD10\_RS00080), while a gene with the same predicted function (SOD10\_RS14125) was downregulated due to the *L. maculans* MB158 VOCs treatment.

We found only one DEG putatively involved in the production of secondary metabolites, while two other identified genes were neither downregulated nor upregulated. The DEG was identified as SOD10\_RS02040, coding for an acyl carrier protein. The expression of this gene, which is a carrier protein mediating biosynthetic pathways including polyketide and nonribosomal peptide synthases was

downregulated in *S. plymuthica* due to the treatment with *L. maculans* volatiles (Supplemental Table S5).

### **Different expression of genes involved in selected functions with the focus on biofilm formation and cellular motility**

Eight DEGs were identified that are putatively involved in cell motility and biofilm formation (Supplemental Table S5). As previously mentioned, the VOCs of all three fungal pathogens enhanced processes involved in biofilm formation of *S. plymuthica* HRO-C48 as shown by a downregulation of two genes encoding the multiple stress resistance protein BhSA (SOD10\_S16560 and SOD10\_S16565). The treatment with *R. solani* AG2 VOCs resulted additionally in an upregulation of the P pilus assembly protein, pilin FimA (SOD10\_RS04660). Such upregulation may also result in slowing down the rate of movement and enhancement of biofilm formation (De La Fuente et al., 2007).

The effect on the cellular motility was on the other hand not that unambiguous. As mentioned earlier, treatments with the volatiles of all three fungal species resulted in the downregulation of the genes putatively responsible for the effectors of murein hydrolases (SOD10\_S19040 and SOD10\_S19045) and genes responsible for multiple stress resistance proteins BhSA (SOD10\_S16560 and SOD10\_S16565). Such downregulation may be associated with the decrease in cell motility (Vollmer et al. 2008; X.-S. Zhang, García-Contreras, and Wood 2007; Romeo 1998). The inactivation of the genes involved in the Cpx response (S08675 and S00410), on the other hand, was shown to adversely affect assembly of some pili and thereby increase cellular motility (Vogt and Raivio, 2012). Two genes involved in the Cpx response were significantly downregulated due to the contact with *L. maculans* MB158 VOCs (SOD10\_RS08675 and SOD10\_RS00410) and *V. longisporum* ELV 43 VOCs (SOD10\_RS08675) (Table 3). *R. solani* AG2 VOCs also resulted in upregulation of a gene putatively coding for the Sec-independent protein secretion pathway components (SOD10\_RS00080). This gene is involved in secretion of pili and flagella (Kostakioti et al., 2005) and may thus facilitate an increase in cellular motility. Thus, we conclude that VOCs of all three fungi enhance biofilm formation in *S. plymuthica* HRO-C48, while their effect on the cellular motility is adverse

### **Different expression of genes involved in selected functions with the focus on stress response**

The second strongest response to the fungal volatiles was observed in the expression of genes involved in stress response. Twenty-five genes involved in stress response were significantly up- or down-regulated in *S. plymuthica* HRO-C48 due to the treatment with VOCs of *R. solani* AG2, *L. maculans* MB158 or *V. longisporum* ELV 43 (Supplemental Table S5). We already mentioned the downregulation of specific genes in *S. plymuthica* HRO-C48 coding for predicted multiple stress resistance proteins BhSA (SOD10\_RS16565, SOD10\_RS16560), outer membrane lipoprotein (SOD10\_RS06090),

Ferritin-like protein (SOD10\_RS01830) and upregulation of phage shock proteins B (SOD10\_RRS23105) in all three treatments with fungal volatiles. These changes in gene regulation are associated with cellular stress. The enhancement of biofilm formation and thus a reduction of cellular motility due to the contact with fungal VOCs is another indicator of cellular stress (Zhang et al., 2007). In addition to the above-mentioned changes in gene expression levels, we also observed the upregulation of three further genes responsible for phage-shock proteins. Such upregulation is associated with the general stress response in various cells (Darwin, 2005; Horstman and Darwin, 2012). Two of the genes (SOD10\_RS18925 and SOD10\_RS23095) were significantly downregulated following treatments with *R. solani* AG2 and *V. longisporum* ELV 43 VOCs and one (SOD10\_RS23110) due to *L. maculans* MB158 VOCs. We also observed a significant downregulation of four further genes coding for predicted outer membrane proteins due to *L. maculans* MB158 VOCs and of three genes due to treatments with *V. longisporum* ELV 43 VOCs. Downregulation of outer membrane proteins is a signal of an envelope stress in a ‘sigma E dependent’ manner (Johansen et al. 2008). A range of genes involved in stress-induced transcriptional response were significantly up- or downregulated in *S. plymuthica* HRO-C48 due to treatment with fungal volatiles. For example, two genes coding for tRNA-Ser were upregulated in *S. plymuthica* HRO-C48 due to treatments with *R. solani* AG2 volatiles (Supplemental Table S5). Among other functions, tRNA-Ser serves as sensor for cellular stress like nutritional deprivation and regulates apoptosis (Raina and Ibba, 2014). *R. solani* AG2 and *L. maculans* MB158 VOCs induced an upregulation of the expression of the gene SOD10\_RS23100 coding for a putative stress-responsive transcriptional regulator, which is another signal of a stress response on transcriptional level. Upregulation of the expression of two universal stress proteins UspA was observed in the treatment with *L. maculans* MB158 VOCs, while one of these genes (SOD10\_RS01300) was also upregulated in the treatment with *V. longisporum* ELV 43 VOCs. UspA proteins may have a general protective function related to the growth arrest state. They are also required for resistance to DNA damaging agents (Nyström and Neidhardt, 1994, 1996; Diez et al., 2000). Three genes coding for a predicted bacterial nucleoid DNA-binding protein were downregulated due to treatment with *L. maculans* MB158 VOCs. These proteins help compact the DNA into microdomains and act as global regulators of transcription. They also play crucial roles in the ability of a bacterium to adapt to unfavorable conditions (Hołówka and Zakrzewska-Czerwińska, 2020). Interestingly, while one gene that encodes a cold shock protein was upregulated due to treatment with *R. solani* AG2 volatiles, the gene putatively coding for the Co-chaperonin GroES (HSP10) was downregulated due to the *V. longisporum* ELV 43 and *L. maculans* MB158 VOCs treatments. Cold shock proteins are a general response to a rapid temperature downshift. They are thought to counteract harmful effects of cold by serving as nucleic acid chaperons that may prevent the formation of secondary structures in mRNA at low temperature and thus facilitate the initiation of translation (Keto-Timonen et al., 2016). HSP10 is involved in protection of the cell from diverse stresses such as temperature and phage attack (Liu and Lund, 2007). We observed a significant downregulation of four

genes involved in protection against oxidative stress. A gene coding for a ferritin-like protein was downregulated following treatments with all three fungi, while genes coding for a predicted peroxiredoxin and a DNA-binding ferritin-like proteins were downregulated in the *L. maculans* MB158 VOCs treatment. Thus, we conclude that volatiles of all three fungi induce stress response in *S. plymuthica* HRO-C48 on transcriptional level.

Akpata, E., and Akinrimisi, E. (1977). Antibacterial activity of extracts from some African chewing sticks. *Oral surgery, oral medicine, oral pathology* 44, 717–722.

Ando, H., Kurata, A., and Kishimoto, N. (2015). Antimicrobial properties and mechanism of volatile isoamyl acetate, a main flavour component of Japanese sake (Ginjo-shu). *Journal of Applied Microbiology* 118, 873–880. doi: 10.1111/jam.12764.

Andrews, S. C. (2010). The Ferritin-like superfamily: Evolution of the biological iron storeman from a rubrerythrin-like ancestor. *Biochimica et Biophysica Acta (BBA)-General Subjects* 1800, 691–705.

Audrain, B., Farag, M. A., Ryu, C. M., and Ghigo, J. M. (2015). Role of bacterial volatile compounds in bacterial biology. *FEMS Microbiology Reviews* 39, 222–233. doi: 10.1093/femsre/fuu013.

Chakraborty, S., Gogoi, M., and Chakravorty, D. (2015). Lactoylglutathione lyase, a critical enzyme in methylglyoxal detoxification, contributes to survival of Salmonella in the nutrient rich environment. *Virulence* 6, 50–65.

Darwin, A. J. (2005). The phage-shock-protein response. *Molecular microbiology* 57, 621–628.

De La Fuente, L., Burr, T. J., and Hoch, H. C. (2007). Mutations in type I and type IV pilus biosynthetic genes affect twitching motility rates in *Xylella fastidiosa*. *Journal of bacteriology* 189, 7507–7510.

Deutscher, J., Francke, C., and Postma, P. W. (2006). How phosphotransferase system-related protein phosphorylation regulates carbohydrate metabolism in bacteria. *Microbiology and molecular biology Reviews* 70, 939–1031.

Diez, A., Gustavsson, N., and Nyström, T. (2000). The universal stress protein A of *Escherichia coli* is required for resistance to DNA damaging agents and is regulated by a RecA/FtsK-dependent regulatory pathway. *Molecular microbiology* 36, 1494–1503.

Dunstan, R. A., Heinz, E., Wijeyewickrema, L. C., Pike, R. N., Purcell, A. W., Evans, T. J., et al. (2013). Assembly of the Type II Secretion System such as Found in *Vibrio cholerae* Depends on the Novel Pilotin AspS. *PLOS Pathogens* 9, e1003117. doi: 10.1371/journal.ppat.1003117.

Farh, M. E. A., and Jeon, J. (2020). Roles of fungal volatiles from perspective of distinct lifestyles in filamentous fungi. *Plant Pathology Journal* 36, 193–203. doi: 10.5423/PPJ.RW.02.2020.0025.

Fialho, M. B., Ferreira, L. F. R., Monteiro, R. T. R., and Pascholati, S. F. (2011). Antimicrobial volatile organic compounds affect morphogenesis-related enzymes in *Guignardia citricarpa*, causal agent of citrus black spot. *Biocontrol science and technology* 21, 797–807.

Grover, G., and GS, G. (1980). Antimicrobial studies of eugenol acetate, geranyl acetate and methyl heptenone.

- Hołówka, J., and Zakrzewska-Czerwińska, J. (2020). Nucleoid Associated Proteins: The Small Organizers That Help to Cope With Stress. *Frontiers in microbiology* 11, 590.
- Horstman, N. K., and Darwin, A. J. (2012). Phage shock proteins B and C prevent lethal cytoplasmic membrane permeability in *Yersinia enterocolitica*. *Molecular microbiology* 85, 445–460.
- Humphris, S. N., Wheatley, R. E., and Bruce, A. (2001). The effects of specific volatile organic compounds produced by *Trichoderma* spp. on the growth of wood decay basidiomycetes. *Holzforschung* 55, 233–237.
- Johansen, J., Eriksen, M., Kallipolitis, B., and Valentin-Hansen, P. (2008). Down-regulation of outer membrane proteins by noncoding RNAs: unraveling the cAMP–CRP-and  $\sigma$ E-dependent CyaR–ompX regulatory case. *Journal of molecular biology* 383, 1–9.
- Kanchiswamy, C. N., Malnoy, M., and Maffei, M. E. (2015). Chemical diversity of microbial volatiles and their potential for plant growth and productivity. *Frontiers in Plant Science* 6. doi: 10.3389/fpls.2015.00151.
- Kato, N., and Shibasaki, I. (1980). The antimicrobial characteristics of 1-alkanols. *J. Antibact. Antifung. Agents* 8, 325–331.
- Keto-Timonen, R., Hietala, N., Palonen, E., Hakakorpi, A., Lindström, M., and Korkeala, H. (2016). Cold shock proteins: a minireview with special emphasis on Csp-family of enteropathogenic *Yersinia*. *Frontiers in microbiology* 7, 1151.
- Kostakioti, M., Newman, C. L., Thanassi, D. G., and Stathopoulos, C. (2005). Mechanisms of protein export across the bacterial outer membrane. *Journal of bacteriology* 187, 4306–4314.
- Kubo, I., Muroi, H., and Kubo, A. (1995). Structural functions of antimicrobial long-chain alcohols and phenols. *Bioorganic & medicinal chemistry* 3, 873–880.
- Kumari, N., Menghani, E., and Mithal, R. (2019). GCMS analysis of compounds extracted from actinomycetes AIA6 isolates and study of its antimicrobial efficacy.
- Lazazzara, V., Perazzolli, M., Pertot, I., Biasioli, F., Puopolo, G., and Cappellin, L. (2017). Growth media affect the volatilome and antimicrobial activity against *Phytophthora infestans* in four *Lysobacter* type strains. *Microbiological research* 201, 52–62.
- Létoffé, S., Audrain, B., Bernier, S. P., Delepierre, M., and Ghigo, J.-M. (2014). Aerial Exposure to the Bacterial Volatile Compound Trimethylamine Modifies Antibiotic Resistance of Physically Separated Bacteria by Raising Culture Medium pH. *mBio* 5. doi: 10.1128/mBio.00944-13.
- Linton, C. J., and Wright, S. J. L. (1993a). Volatile organic compounds: microbiological aspects and some technological implications. *Journal of Applied Bacteriology* 75, 1–12. doi: 10.1111/j.1365-2672.1993.tb03400.x.
- Linton, C., and Wright, S. (1993b). Volatile organic compounds: microbiological aspects and some technological implications. *Journal of applied bacteriology* 75, 1–12.
- Liu, H., and Lund, P. A. (2007). “The Roles of GroES as a Co-Chaperone for GroEL,” in *Networking of Chaperones by Co-Chaperones* (Springer), 75–87.



- Naznin, H. A., Kimura, M., Miyazawa, M., and Hyakumachi, M. (2013). Analysis of volatile organic compounds emitted by plant growth-promoting fungus *Phoma* sp. GS8-3 for growth promotion effects on tobacco. *Microbes and environments* 28, 42–49.
- Nyström, T., and Neidhardt, F. C. (1994). Expression and role of the universal stress protein, UspA, of *Escherichia coli* during growth arrest. *Molecular microbiology* 11, 537–544.
- Nyström, T., and Neidhardt, F. C. (1996). Effects of overproducing the universal stress protein, UspA, in *Escherichia coli* K-12. *Journal of bacteriology* 178, 927–930.
- Ohara, M., Wu, H. C., Sankaran, K., and Rick, P. D. (1999). Identification and characterization of a new lipoprotein, Nlpl, in *Escherichia coli* K-12. *Journal of bacteriology* 181, 4318–4325.
- Pimenta, R. S., Moreira da Silva, J. F., Buyer, J. S., and Janisiewicz, W. J. (2012). Endophytic fungi from plums (*Prunus domestica*) and their antifungal activity against *Monilinia fructicola*. *Journal of Food Protection* 75, 1883–1889.
- Popova, A. A., Koksharova, O. A., Lipasova, V. A., Zaitseva, J. V., Katkova-Zhukotskaya, O. A., Eremina, S. I., et al. (2014). Inhibitory and toxic effects of volatiles emitted by strains of *Pseudomonas* and *Serratia* on growth and survival of selected microorganisms, *Caenorhabditis elegans*, and *Drosophila melanogaster*. *BioMed Research International* 2014.
- Raina, M., and Ibba, M. (2014). tRNAs as regulators of biological processes. *Front Genet* 5. doi: 10.3389/fgene.2014.00171.
- Romeo, T. (1998). Global regulation by the small RNA-binding protein CsrA and the non-coding RNA molecule CsrB. *Molecular microbiology* 29, 1321–1330.
- Ryu, C.-M., Farag, M. A., Hu, C.-H., Reddy, M. S., Kloepper, J. W., and Paré, P. W. (2004). Bacterial volatiles induce systemic resistance in *Arabidopsis*. *Plant physiology* 134, 1017–1026.
- Ryu, C.-M., Farag, M. A., Hu, C.-H., Reddy, M. S., Wei, H.-X., Paré, P. W., et al. (2003). Bacterial volatiles promote growth in *Arabidopsis*. *Proceedings of the National Academy of Sciences* 100, 4927–4932.
- Saksena, N., and Tripathi, H. (1987). Effect of organic volatiles from *Saccharomyces* on the spore germination of fungi. *Acta Microbiologica Hungarica* 34, 255–257.
- Smith, J. L. (2004). The physiological role of ferritin-like compounds in bacteria. *Critical reviews in microbiology* 30, 173–185.
- Strobel, G. A., Dirkse, E., Sears, J., and Markworth, C. (2001). Volatile antimicrobials from *Muscodora albus*, a novel endophytic fungus. *Microbiology* 147, 2943–2950.
- Teufel, R., Mascaraque, V., Ismail, W., Voss, M., Perera, J., Eisenreich, W., et al. (2010). Bacterial phenylalanine and phenylacetate catabolic pathway revealed. *Proceedings of the National Academy of Sciences* 107, 14390–14395.
- Toffano, L., Fialho, M. B., and Pascholati, S. F. (2017). Potential of fumigation of orange fruits with volatile organic compounds produced by *Saccharomyces cerevisiae* to control citrus black spot disease at postharvest. *Biological Control* 108, 77–82.

- Togashi, N., Shiraishi, A., Nishizaka, M., Matsuoka, K., Endo, K., Hamashima, H., et al. (2007). Antibacterial activity of long-chain fatty alcohols against *Staphylococcus aureus*. *Molecules* 12, 139–148.
- Tosi, T., Nickerson, N. N., Mollica, L., Jensen, M. R., Blackledge, M., Baron, B., et al. (2011). Pilotin–secretin recognition in the type II secretion system of *Klebsiella oxytoca*. *Molecular Microbiology* 82, 1422–1432. doi: 10.1111/j.1365-2958.2011.07896.x.
- Venkataraman, A., Rosenbaum, M. A., Werner, J. J., Winans, S. C., and Angenent, L. T. (2014). Metabolite transfer with the fermentation product 2, 3-butanediol enhances virulence by *Pseudomonas aeruginosa*. *The ISME journal* 8, 1210–1220.
- Vogt, S. L., and Raivio, T. L. (2012). Just scratching the surface: an expanding view of the Cpx envelope stress response. *FEMS microbiology letters* 326, 2–11.
- Vollmer, W., Joris, B., Charlier, P., and Foster, S. (2008). Bacterial peptidoglycan (murein) hydrolases. *FEMS Microbiol Rev* 32, 259–286. doi: 10.1111/j.1574-6976.2007.00099.x.
- Zhang, H., Kim, M.-S., Krishnamachari, V., Payton, P., Sun, Y., Grimson, M., et al. (2007a). Rhizobacterial volatile emissions regulate auxin homeostasis and cell expansion in *Arabidopsis*. *Planta* 226, 839–851.
- Zhang, X.-S., García-Contreras, R., and Wood, T. K. (2007b). YcfR (BhsA) influences *Escherichia coli* biofilm formation through stress response and surface hydrophobicity. *Journal of bacteriology* 189, 3051–3062.
- Zückert, W. R. (2014). Secretion of bacterial lipoproteins: through the cytoplasmic membrane, the periplasm and beyond. *Biochimica et Biophysica Acta (BBA)-Molecular Cell Research* 1843, 1509–1516.
